# Supplementary material for: The patient-specific mouse model with Foxg1 frameshift mutation uncovers the pathophysiology of FOXG1 syndrome
Source: Research Square preprint supplement (doi:10.21203/rs.3.rs-2953760/v1), 2023-06-02
Supplement: Supplementary file 1 [file d78bade99878d3e9be7e42d9.docx]

**Supplementary Information**


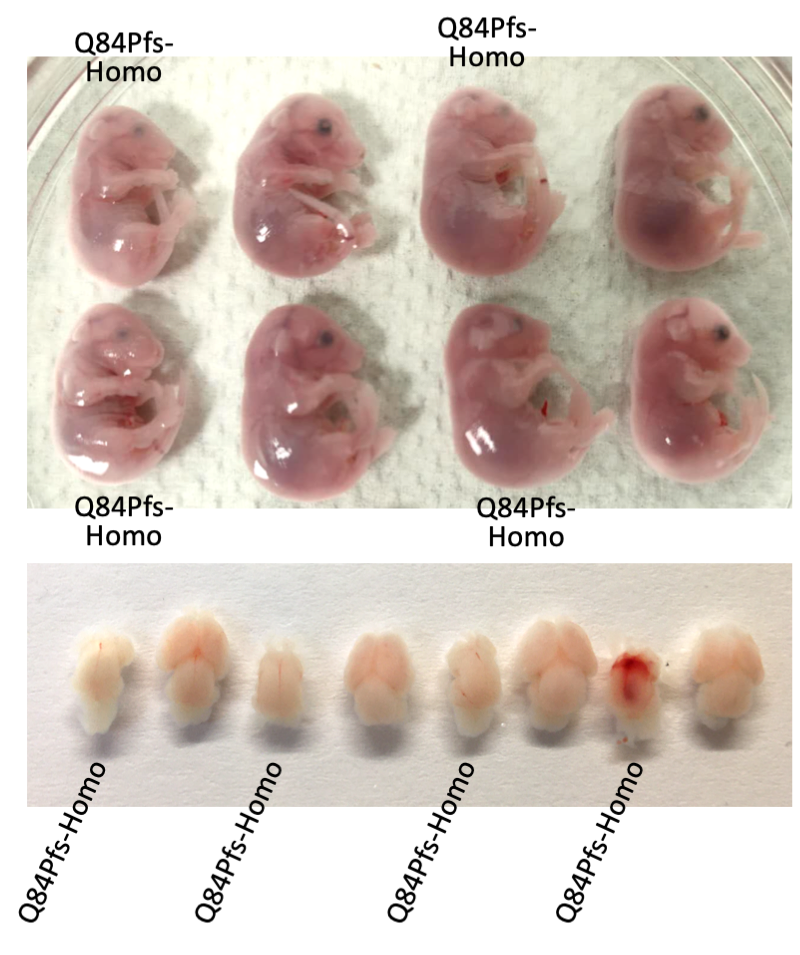


**Fig. 1**: Overarching research goal of identifying and characterizing key gene regulatory networks in three distinct model systems, supported by three RO1s from NINDS. See text for more details.

**Supplementary Fig. 1. Craniofacial defects of Q84Pfs-Homo mice.** Q84Pfs-Homo mice exhibited craniofacial defects, such as a short frontonasal process, and underdeveloped eye morphology (top). Q84Pfs-Homo mice also showed smaller brains (bottom).

**
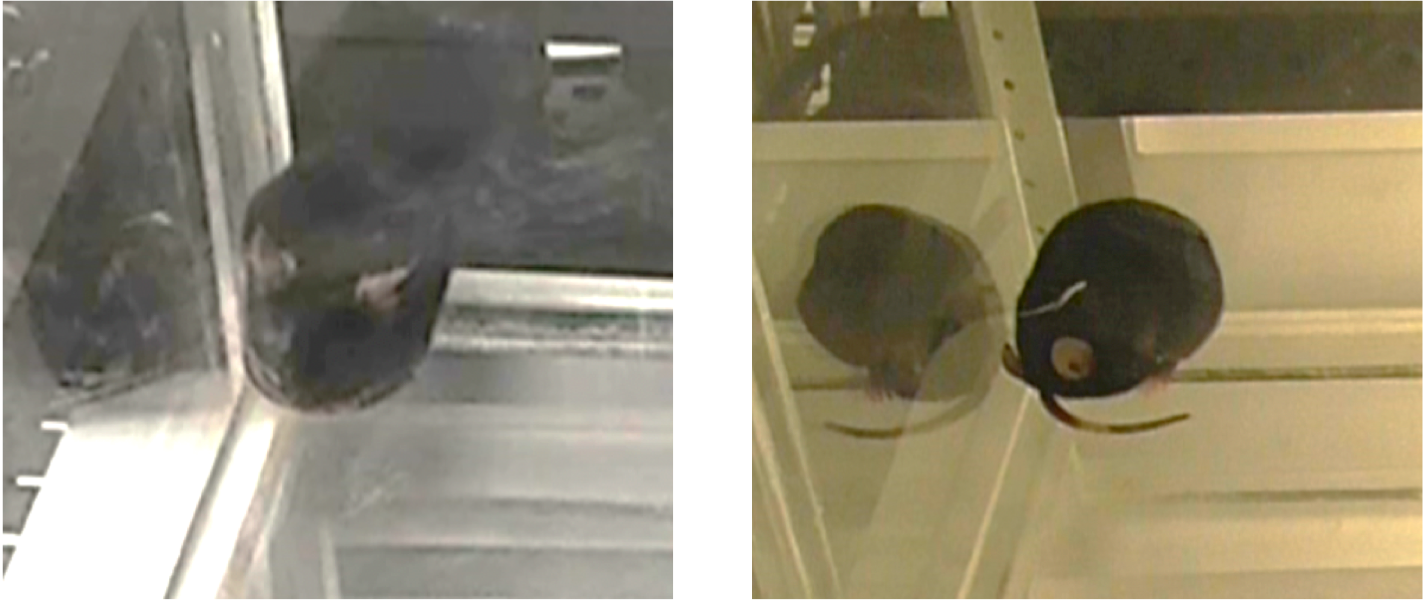
**

**Supplementary Fig. 2. Prolonged behavior arrest of Q84Pfs-Het mice.** Example photos of Q84Pfs-Het mice exhibiting prolonged behavioral arrest. Mice showing this behavior were always sitting in the corner of the cage and usually had their faces positioned outward towards the center of the cage (left). One mouse’s body appeared quite hunched, and its head was positioned underneath its body for several minutes (right). Full videos are also included in the supplementary information.

**Supplementary video 1:** Example of WT mouse behavior during the locomotor open field test (P60, female).

**Supplementary video 2:** Example of Q84Pfs-Het mouse exhibiting prolonged behavior arrest during the locomotor open field test (P60, female). This was the longest period of behavior arrest that was observed (approximately 14 minutes).

**Supplementary video 3:** Example of Q84Pfs-Het mouse exhibiting prolonged behavior arrest with abnormal body positioning during the locomotor open Field test (P90, female).

**Supplementary data, DEGs in Excel sheet**

222 differentially expressed genes (DEGs, 118 upregulated genes, and 104 downregulated genes) of Q84Pfs-Het cortex, relative to WT cortex, are listed.

**Statistics**

**Fig. 4**

b. *Cortex thickness*: Unpaired two-tailed t test

t= 4.340, df= 52, p< 0.0001

c. *Pax6+ area thickness*: Unpaired two-tailed t test

t= 6.571, df= 52, p< 0.0001

e. *pHH3+ cell counting*: Unpaired two-tailed t test

t= 2.968, df= 4, p= 0.0412

**Fig. 5**

c. *Cortex thickness*: Unpaired two-tailed t test

t= 7.341, df= 16, p< 0.0001

d. *Deep layer thickness*: Unpaired two-tailed t test

t= 0.6537, df= 4, p= 0.5490

e. *Upper layer thickness*: Unpaired two-tailed t test

t= 3.700, df= 4, p= 0.0208

g. *Dlx1+ cell counting*: Unpaired two-tailed t test

t= 4.844, df= 6, p= 0.0029

**Fig. 6**

b. *Olig2+ cell counting*: Unpaired two-tailed t test

t= 4.267, df= 16, p= 0.0006

d. *Mbp+ area ratio*: Unpaired two-tailed t test

t= 6.583, df= 8, p= 0.0002

e. *Relative Mbp intensity*: Unpaired two-tailed t test

t= 6.482, df= 22, p< 0.0001

**Fig. 7**

*c. Body weight*:Two-way repeated measures ANOVA

<Male>

Interaction: F(2,38)= 3.259, p= 0.0494

Age (P30, P60, or P90): F(2,38)= 685.4, p< 0.0001

Genotype (WT or Q84Pfs-Het): F(1,19)= 0.009348, p= 0.9240

Post-hoc (Sidak)

“P30: WT vs. Q84Pfs-Het” p= 0.4538, Mean diff.= 0.8806, 95.00% CI of diff.= -0.7247 to 2.486

“P60: WT vs. Q84Pfs-Het” p= 0.3158, Mean diff.= -1.033, 95.00% CI of diff.= -2.639 to 0.5719

“P90: WT vs. Q84Pfs-Het” p= 0.9595, Mean diff.= 0.2917, 95.00% CI of diff.= -1.314 to 1.897

<Female>

Interaction: F(2,34)= 0.8790, p= 0.4244

Age (P30, P60, or P90): F(1.281,21.78)= 137.9, p< 0.0001

Genotype (WT or Q84Pfs-Het): F(1,17)= 2.256, p= 0.1514

Post-hoc (Sidak)

“P30: WT vs. Q84Pfs-Het” p= 0.9843, Mean diff.= 0.3367, 95.00% CI of diff.= -2.562 to 3.235

“P60: WT vs. Q84Pfs-Het” p= 0.2616, Mean diff.= 1.409, 95.00% CI of diff.= -0.7821 to 3.600

“P90: WT vs. Q84Pfs-Het” p= 0.3758, Mean diff.= 1.906, 95.00% CI of diff.= -1.490 to 5.301

*d. Wire hanging*:Two-way ANOVA

Interaction: F(2,76)=3.710, p=0.0290

Age (P30, P60, or P90): F(1.684,64.00)= 2.797, p= 0.0772

Genotype (WT or Q84Pfs-Het): F(1,40)= 14.16, p= 0.0005

Post-hoc (Sidak)

“P30: WT vs. Q84Pfs-Het” p= 0.3674, Mean diff.= 125.3, 95.00% CI of diff.= -82.93 to 333.6

“P60: WT vs. Q84Pfs-Het” p= 0.0032, Mean diff.= 309.5, 95.00% CI of diff.= 92.78 to 526.3

“P90: WT vs. Q84Pfs-Het” p= 0.0008, Mean diff.= 310.3, 95.00% CI of diff.= 123.0 to 497.6

*e. Travel distance in Open field test*:Two-way repeated measures ANOVA

For P30,

Interaction: F(5,180)= 8.418, p< 0.0001

Time (min): F(3.350,120.6)= 35.36, p< 0.0001

Genotype (WT or Q84Pfs-Het): F(1,36)= 0.01682, p= 0.8975

Post-hoc (Sidak)

“10 min: WT vs. Q84Pfs-Het” p= 0.1764, Mean diff.= -310.7, 95.00% CI of diff.= -699.8 to 78.45

“20 min: WT vs. Q84Pfs-Het” p= 0.2451, Mean diff.= -241.2, 95.00% CI of diff.= -565.9 to 83.50

“30 min: WT vs. Q84Pfs-Het” p= 0.9975, Mean diff.= -48.40, 95.00% CI of diff.= -328.4 to 231.6

“40 min: WT vs. Q84Pfs-Het” p= 0.9639, Mean diff.= 90.37, 95.00% CI of diff.= -221.5 to 402.2

“50 min: WT vs. Q84Pfs-Het” p= 0.6118, Mean diff.= 186.3, 95.00% CI of diff.= -167.1 to 539.8

“60 min: WT vs. Q84Pfs-Het” p= 0.1409, Mean diff.= 253.4, 95.00% CI of diff.= -48.30 to 555.0

For P60,

Interaction: F(5,180)= 3.649, p= 0.0036

Time (min): F(3.315,119.3)= 92.91, p< 0.0001

Genotype (WT or Q84Pfs-Het): F(1,36)= 30.01, p< 0.0001

Post-hoc (Sidak)

“10 min: WT vs. Q84Pfs-Het” p= 0.2737, Mean diff.= 258.4, 95.00% CI of diff.= -100.5 to 617.3

“20 min: WT vs. Q84Pfs-Het” p= 0.0001, Mean diff.= 416.3, 95.00% CI of diff.= 183.6 to 649.0

“30 min: WT vs. Q84Pfs-Het” p< 0.0001, Mean diff.= 562.4, 95.00% CI of diff.= 254.4 to 870.5

“40 min: WT vs. Q84Pfs-Het” p= 0.0010, Mean diff.= 522.0, 95.00% CI of diff.= 179.2 to 864.9

“50 min: WT vs. Q84Pfs-Het” p= 0.0003, Mean diff.= 555.0, 95.00% CI of diff.= 221.1 to 889.0

“60 min: WT vs. Q84Pfs-Het” p <0.0001, Mean diff.= 651.3, 95.00% CI of diff.= 343.5 to 959.1

For P90,

Interaction: F(5,185)= 2.866, P= 0.0162

Time (min): F(1.958,72.44)= 56.44, p< 0.0001

Genotype (WT or Q84Pfs-Het): F(1,37)= 12.35, P= 0.0012

Post-hoc (Sidak)

“10 min: WT vs. Q84Pfs-Het” p= 0.9821, Mean diff.= 135.0, 95.00% CI of diff.= -410.2 to 680.2

“20 min: WT vs. Q84Pfs-Het” p= 0.6561, Mean diff.= 265.9, 95.00% CI of diff.= -264.0 to 795.9

“30 min: WT vs. Q84Pfs-Het” p= 0.0631, Mean diff.= 353.8, 95.00% CI of diff.= -12.70 to 720.2

“40 min: WT vs. Q84Pfs-Het” p= 0.0027, Mean diff.= 548.5, 95.00% CI of diff.= 158.0 to 938.9

“50 min: WT vs. Q84Pfs-Het” p= 0.0239, Mean diff.= 505.4, 95.00% CI of diff.= 48.41 to 962.3

“60 min: WT vs. Q84Pfs-Het” p= 0.0002, Mean diff.= 631.0, 95.00% CI of diff.= 259.1 to 1003

*g. Center time in Open field test*:Two-way ANOVA

Interaction: F(2,72)= 2.333, p= 0.1043

Age (P30, P60, or P90): F(1.717,61.82)= 7.072, p= 0.0028

Genotype (WT or Q84Pfs-Het): F(1,37)= 20.17, p< 0.0001

Post-hoc (Sidak)

“P30: WT vs. Q84Pfs-Het” p= 0.0681, Mean diff.= 141.1, 95.00% CI of diff.= -7.960 to 290.2

“P60: WT vs. Q84Pfs-Het” p= 0.0007, Mean diff.= 253.2, 95.00% CI of diff.= 101.7 to 404.7

“P90: WT vs. Q84Pfs-Het” p< 0.0001, Mean diff.= 235.6, 95.00% CI of diff.= 120.5 to 350.7

*h. Average duration of grooming in Open field test*: Mann-Whitney test

“P30: WT vs. Q84Pfs-Het” p= 0.003179

“P60: WT vs. Q84Pfs-Het” p= 0.000063

“P90: WT vs. Q84Pfs-Het” p= 0.000194

*i. Marble burying test*:Two-way ANOVA

Interaction: F(2,76)= 48.99, p< 0.0001

Age (P30, P60, or P90): F(1.947,73.98)= 83.71, p< 0.0001

Genotype (WT or Q84Pfs-Het): F(1,40)= 12.39, p= 0.0001

Post-hoc (Sidak)

“P30: WT vs. Q84Pfs-Het” p= 0.0896, Mean diff.= 2.823, 95.00% CI of diff.= -0.3338 to 5.979

“P60: WT vs. Q84Pfs-Het” p< 0.0001, Mean diff.= -6.880, 95.00% CI of diff.= -9.802 to -3.957

“P90: WT vs. Q84Pfs-Het” p< 0.0001, Mean diff.= -7.038, 95.00% CI of diff.= -10.05 to -4.029
